# Supplementary material
Source: publisher figshare collection journal article supplement (https://acs.figshare.com/ndownloader/files/4780660)
Supplement: Supplementary file 1 [file 4780660]

# Enantioselective Synthesis of Ferrocenyl Nucleoside Analogs with Apoptosis-Inducing Activity

Philippe James<sup>†</sup>, Jörg Neudörfl<sup>†</sup>, Moritz Eißmann<sup>‡</sup>, Patrick Jesse<sup>‡</sup>, Aram Prokop<sup>‡\*</sup>, and  
Hans-Günther Schmalz<sup>†\*</sup>

<sup>†</sup>*Institute of Organic Chemistry, University of Cologne, Greinstr. 4, 50939 Köln, Germany*

<sup>‡</sup>*Department of Pediatric Oncology/Hematology, University Medical Center Charité,  
Campus Virchow, Humboldt University of Berlin, 13353 Berlin, Germany*

*schmalz@uni-koeln.de*

## Supporting Information

**Contents:** experimental procedures and full characterization of new compounds (**6-11**, **13-18**); X-ray crystallographic data for compounds **6** and **15**; <sup>1</sup>H and <sup>13</sup>C NMR spectra.

### I. General experimental conditions

Reactions were conducted in flame-dried glassware under an atmosphere of argon using freshly distilled anhydrous solvents. NMR spectra were recorded at 300 MHz for protons and at 75 MHz for carbons. Deuterated chloroform was used as solvent unless otherwise indicated. Proton shifts are reported in ppm (δ) downfield from TMS and were determined by reference to the residual solvent peaks (CDCl<sub>3</sub>: 7.24 ppm, CD<sub>3</sub>OD: 3.31 ppm). Data are reported as follows: chemical shift (multiplicity [singlet (s), doublet (d), triplet (t), quartet (q), quintet (quint), hexet (hex) and multiplet (m)], coupling constants [Hz], integration, assignment). <sup>13</sup>C NMR spectra were recorded using an APT sequence with complete proton decoupling. Multiplicities (C, CH<sub>2</sub> or CH, CH<sub>3</sub>) were deduced from these spectra. <sup>13</sup>C chemical shifts are reported in ppm (δ) relative to solvent resonance as the internal standard (CDCl<sub>3</sub>: 77 ppm, CD<sub>3</sub>OD: 49.05 ppm). Melting points are not corrected. Optical rotations were recorded at the given wavelengths (path length 100 mm).

The TMS-protected nucleobases (TMS)<sub>2</sub>cytosine and (TMS)<sub>2</sub>uracil, respectively, were prepared from cytosine or uracil by treatment with an excess of HMDS and TMSCl at 80°C for 2 d and isolation of the product by distillation under reduced pressure (0.1 torr).

## II. Synthetic procedures and characterization of the new products

### II.1. Synthesis of ester **5** through diastereoselective ortho-deprotonation/alkylation.

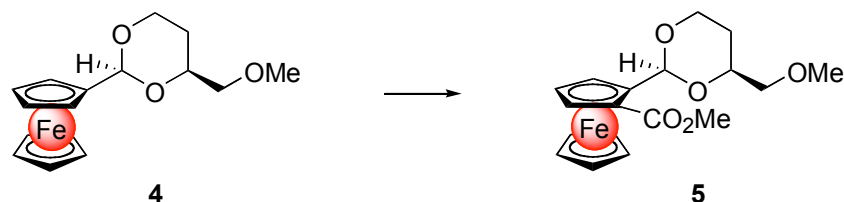

To a cooled solution of **4**<sup>1</sup> ( $[\alpha]^{20}_{\text{D}} -32.4$ ,  $c$  0.70,  $\text{CHCl}_3$ ,  $[\alpha]^{20}_{\text{D(lit.)}}^1 -32.5$ ; 4.03 g, 1 equiv., 12.75 mmol) in dry diethyl ether (65 mL) under argon atmosphere was added dropwise at  $-78^\circ\text{C}$  a 1.5 M solution of *t*-BuLi in hexanes (9.4 mL, 1.1 equiv., 14.02 mmol). After 10 min. at this temperature, the cooling bath was removed and the temperature was allowed to warm to room temperature and stirred 1 h. The suspension was then cannulated to an other apparatus in an additional funnel which was fixed onto a three-necked round-bottom flask (with thermometer and line to argon/vacuum) containing an excess of methyl chloroformate (9.9 mL, 10 equiv., 128 mmol) in ether (10 mL) maintained at a temperature of  $-50^\circ\text{C}$ . The suspension was then added dropwise slowly to the stirred solution of electrophile. After the addition, the temperature was allowed to warm slowly to room temperature and was stirred overnight at this temperature. The mixture was then quenched with water and the layers were separated. The organic layer was washed with saturated aqueous  $\text{NH}_4\text{Cl}$  solution, brine, dried over  $\text{Na}_2\text{SO}_4$ , filtered and concentrated under vacuum. Flash chromatography (cyclohexane/ethyl acetate 2:1) gave the desired ester **5**<sup>1</sup> as a brown oil (3.27 g, 69 %;  $[\alpha]^{20}_{\text{D}} +19.9$ ,  $c$  0.53,  $\text{CHCl}_3$ ,  $[\alpha]^{20}_{\text{D(lit.)}}^1 +9.0$ ).

### II.2. Synthesis of ester **6** through Horner olefination.

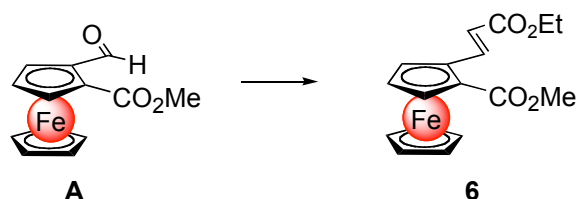

The aldehyde **A** was obtained from **5** through acidic acetal cleavage according to Kagan's procedure<sup>1</sup> ( $[\alpha]^{20}_{\text{D}} +935$ ,  $c$  0.355,  $\text{EtOH}_{\text{abs}}$ ,  $[\alpha]^{20}_{\text{D(lit.)}}^1 +765$ ,  $[\alpha]^{20}_{\text{D(lit.)}}^2 -759$ , (*R*)-config.). Transformation of **A** into the diester **6** was achieved as follow. To a suspension of NaH (60%

<sup>1</sup> Riant, O.; Samuel, O.; Flessner, T.; Taudien, S.; Kagan, H. B. *J. Org. Chem.* **1997**, 62, 6733.

<sup>2</sup> Raptic, V.; Schlögl, K.; Steinitz, B. *Monatsh. Chem.* **1977**, 108, 767.

in mineral oil, washed with dry hexane, 529 mg, 1.5 equiv., 13.21 mmol) in THF (37 mL) under argon atmosphere was added at 0°C, triethylphosphonoacetate (2.6 mL, 1.5 equiv., 13.21 mmol) and the resulting mixture was allowed to warm to room temperature and stirred 1 h. After this period, the aldehyde **A** (2.4 g, 1 equiv., 8.81 mmol) dissolved in THF (16 mL) was added to the mixture. The reaction mixture was stirred at room temperature for another 30 min and the reaction was quenched with a solution of saturated NH<sub>4</sub>Cl. The layers were separated and the aqueous layer was extracted with EtOAc. The combined organic layers were washed with brine, dried over Na<sub>2</sub>SO<sub>4</sub> and filtered. Evaporation of the solvents and purification by flash chromatography (cyclohexane/ethyl acetate 3/1) of the residue afforded a dark red oil which solidifies (2.5 g, 83% yield). **Mp** (CH<sub>2</sub>Cl<sub>2</sub>) +84°C. [ $\alpha$ ]<sub>D</sub><sup>20</sup> +1297.0 (*c* 0.41, CHCl<sub>3</sub>). **IR** (neat)  $\nu$  3095 (w), 2978 (m), 2948 (m), 2902 (w), 1711 (C=O<sub>st</sub>, s), 1694 (C=O<sub>st</sub>, s), 1623 (s), 1449 (s), 1419(s), 1367 (s), 1266 (s), 1216 (s), 1170 (s), 1082 (s), 1038 (s), 984 (s), 939 (m), 857 (s), 820 (s), 776 (s), 732 (m), 678 (w) cm<sup>-1</sup>. **<sup>1</sup>H NMR**  $\delta$  8.26 (d, *J* = 16.0, 1H, CH=CHCO<sub>2</sub>Et), 6.13 (d, *J* = 16.0, 1H, CH=CHCO<sub>2</sub>Et), 4.97 (m, 1H, CHCp), 4.77 (m, 1H, CHCp), 4.56 (t, *J* = 2.7, 1H, CHCp), 4.20 (q, *J* = 7.1, 2H, CH<sub>2</sub>CH<sub>3</sub>), 4.17 (s, 5H, Cp), 3.82 (s, 3H, CH<sub>3</sub>O), 1.31 (t, *J* = 7.1, 3H, CH<sub>3</sub>CH<sub>2</sub>). **<sup>13</sup>C NMR**  $\delta$  171.7 (CpC=O), 166.8 (CH=CHC=O), 143.7 (CH=CHCO<sub>2</sub>Et), 117.4 (CH=CHCO<sub>2</sub>Et), 80.3 (CCp), 73.6 (CHCp), 72.0 (CHCp), 71.4 (Cp), 71.2 (CCp), 69.3 (CHCp), 60.2 (CH<sub>2</sub>CH<sub>3</sub>), 51.7 (CH<sub>3</sub>O), 14.3 (CH<sub>3</sub>CH<sub>2</sub>). **MS** (EI, 70 eV) *m/z* 343 ([M+1]<sup>+</sup>, 5), 342 ([M]<sup>+</sup>, 30), 329 (17), 328 (96), 297 (6), 277 ([M-Cp]<sup>+</sup>, 3), 263 (13), 245 (12), 233 (16), 231 (67), 201 (20), 152 (23), 145 (78), 122 (60), 117 (85), 89 (100), 56 ([Fe]<sup>+</sup>, 45). **HRMS** (EI, 70 eV) calcd. for C<sub>17</sub>H<sub>18</sub>FeO<sub>4</sub> 342.0554. Found 342.055.

### II.3. Synthesis of **7** through conjugate cuprate addition

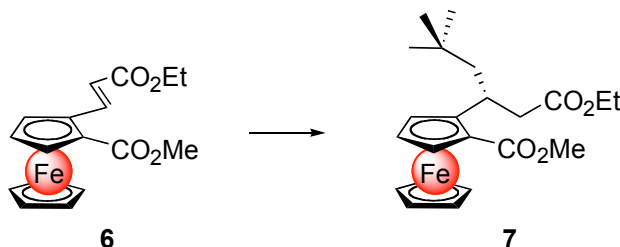

To a mixture of magnesium turnings (988 mg, 1.2 equiv., 40.65 mmol) in dry THF (10 mL) was added under argon atmosphere a small iodine crystal. After activation, 1-bromo-2,2-dimethylpropane (4.3 mL, 1 equiv., 33.88 mmol) in THF (24 mL) was added dropwise so as to maintain a gentle reflux and the mixture was stirred overnight at room temperature. The resulting 1 M solution of 2,2-dimethylpropanemagnesium bromide in THF (12.5 mL, 6

equiv., 12.5 mmol) was added dropwise at  $-78^{\circ}\text{C}$  to a mixture of  $\text{CuBr}\cdot\text{Me}_2\text{S}$  (257 mg, 0.6 equiv., 1.25 mmol) in THF (3 mL) under argon atmosphere. The temperature was allowed to warm to  $-30^{\circ}\text{C}$  for 10 min to give a white slurry and was recooled to  $-78^{\circ}\text{C}$ .  $\text{TMSCl}$  (530  $\mu\text{L}$ , 2 equiv., 4.15 mmol) and then the  $\alpha,\beta$ -unsaturated ferrocenylester **6** (710 mg, 1 equiv., 2.07 mmol) in THF (9.1 mL) were added dropwise successively. The mixture was stirred for 1 h at low temperature (below  $-60^{\circ}\text{C}$ ) and allowed to warm slowly to  $-30^{\circ}\text{C}$ , stirred 1 h at this temperature and finally warm to  $0^{\circ}\text{C}$ . Saturated aqueous  $\text{NH}_4\text{Cl}$  solution was added and the product was extracted with MTBE. The organic layer was washed with brine, dried over  $\text{Na}_2\text{SO}_4$ , filtered and concentrated under vacuum. Flash chromatography (cyclohexane/ethyl acetate 10/1 then 6/1 and then 3/1) gave **7** as a brown oil (839 mg, 2.03 mmol, 98 % yield).  $[\alpha]_D^{20}$   $-24.5$  ( $c$  0.375,  $\text{CHCl}_3$ ). **IR** (neat)  $\nu$  3095 (w), 2949 (m), 2901 (w), 1731 ( $\text{C}=\text{O}$ st, s), 1713 ( $\text{C}=\text{O}$ st, s), 1451 (m), 1365 (m), 1292 (m), 1210 (m), 1189 (m), 1147 (m), 1085 (m), 1033 (m), 818 (w), 776 (w)  $\text{cm}^{-1}$ .  **$^1\text{H}$  NMR**  $\delta$  4.64 (dd,  $J = 2.6, 1.5$ , 1H,  $\text{CHCH}_2\text{CO}_2\text{Et}$ ), 4.21 (t,  $J = 2.6$ , 1H,  $\text{CHCp}$ ), 4.17 (m, 2H,  $\text{CHCp}$ ), 4.09 (q,  $J = 7.1$ , 2H,  $\text{CH}_2\text{CH}_3$ ), 4.04 (s, 5H, Cp), 3.70 (s, 3H,  $\text{CH}_3\text{O}$ ), 3.04 (dd,  $J = 15.8, 4.4$ , 1H,  $\text{CHHCO}_2\text{Et}$ ), 2.60 (dd,  $J = 15.7, 8.7$ , 1H,  $\text{CHHCO}_2\text{Et}$ ), 1.42 (dd,  $J = 14.0, 5.4$ , 1H,  $\text{CHHC}(\text{CH}_3)_3$ ), 1.30 (m, 1H,  $\text{CHHC}(\text{CH}_3)_3$ ), 1.20 (t,  $J = 7.1$ , 3H,  $\text{CH}_3\text{CH}_2$ ), 0.66 (s, 9H,  $(\text{CH}_3)_3\text{C}$ ).  **$^{13}\text{C}$  NMR**  $\delta$  172.8 ( $\text{C}=\text{O}$ ), 172.3 ( $\text{C}=\text{O}$ ), 99.9 ( $\text{CCpC}=\text{O}$ ), 70.6 ( $\text{CHCp}$ ), 70.1 (Cp), 69.4 ( $\text{CHCp}$ ), 69.1 ( $\text{CHCp}$ ), 68.5 ( $\text{CCpCH}$ ), 60.3 ( $\text{CH}_2\text{O}$ ), 52.2 ( $\text{CH}_2\text{CO}_2\text{Et}$ ), 51.3 ( $\text{CH}_3\text{O}$ ), 44.1 ( $\text{CH}_2t\text{-Bu}$ ), 31.1 ( $\text{C}(\text{CH}_3)_3$ ), 30.0 ( $\text{C}(\text{CH}_3)_3$ ), 29.1 ( $\text{CHCH}_2\text{CO}_2\text{Et}$ ), 14.3 ( $\text{CH}_3\text{CH}_2$ ). **MS** (EI, 70 eV)  $m/z = 415$  ( $[\text{M}+1]^+$ , 25), 414 ( $[\text{M}]^+$ , 100), 343 ( $[\text{M}-(\text{CH}_2t\text{-Bu})]^+$ , 2), 297 (8), 257 (11), 239 (8), 175 (13), 121 ( $[\text{FeCp}]^+$ , 22), 105 (14), 91 (14), 57 (32). **HRMS** (EI, 70 eV) calcd. for  $\text{C}_{22}\text{H}_{30}\text{FeO}_4$  414.1493. Found 414.149.

#### II.4. Synthesis of ketone **8** by Dieckmann cyclization

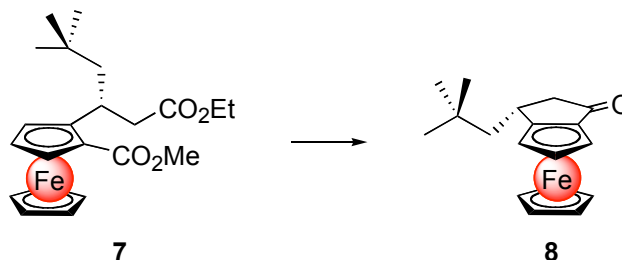

**General procedure:** To a suspension of  $\text{NaH}$  (60% in mineral oil, washed with dry hexane, 4 equiv.) in THF (2.5 mL/mmol) under argon atmosphere was added the diester (1 equiv.) in THF (25 mL/mmol) at room temperature. The orange mixture was then stirred under reflux for 7 h. The obtained dark red solution was cooled in an ice bath,  $\text{MeOH}$  was added slowly,

and then MTBE. The organic layer was washed with a 1 M aqueous solution of HCl then with brine, dried over Na<sub>2</sub>SO<sub>4</sub>, filtered and concentrated under vacuum. The crude product was directly used for the next step without further purification.

Following the general procedure described above, the diester **7** (832 mg, 2.01 mmol) and NaH (321 mg, 8.03 mmol) were reacted. The crude product (2.01 mmol) was dissolved in ethanol (20 mL) and a 1 M solution of NaOH (20 mL) was added. The mixture was heated at +80°C and stirred overnight at this temperature. After cooling to room temperature, MTBE was added and the layers were separated. The aqueous layer was extracted with MTBE and the organic layers were combined. After washing with brine, the solution was dried over Na<sub>2</sub>SO<sub>4</sub>, filtered, and concentrated under vacuum. Purification by flash chromatography (cyclohexane/ethyl acetate 3/1) afforded **8** as a red oil which then solidified (393 mg, 63% yield, 2 steps). **Mp**: +82.2-82.8°C.  $[\alpha]^{20}_{\text{D}} +213.6$  (*c* 0.355, CHCl<sub>3</sub>). **IR** (neat)  $\nu$  3095 (w), 2950 (m), 2906 (w), 2863 (w), 1699 (C=O, s), 1461 (m), 1363 (m), 1291 (m), 1196 (w), 1106 (m), 1073 (w), 1001 (w), 821 (m) cm<sup>-1</sup>. **<sup>1</sup>H NMR**  $\delta$  4.58 (m, 1H, CpH), 4.49 (m, 1H, CpH), 4.38 (m, 1H, CpH), 4.18 (s, 5H, Cp), 3.00-2.80 (m, 3H, CHCH<sub>2</sub>C=O), 1.93 (dd, *J* = 13.7, 2.4, 1H, CHH*t*-Bu), 1.60 (dd, *J* = 14.0, 8.5, 1H, CHH*t*-Bu), 0.95 (s, 9H, *t*-Bu). **<sup>13</sup>C NMR**  $\delta$  207.2 (C=O), 111.3 (CCpC=O), 79.8 (CCp), 75.2 (CHCp), 70.1 (Cp), 65.2 (CHCp), 61.0 (CHCp), 51.8 (CH<sub>2</sub>), 50.8 (CH<sub>2</sub>), 30.9 (C(CH<sub>3</sub>)<sub>3</sub>), 29.9 (C(CH<sub>3</sub>)<sub>3</sub>), 29.5 (CH). **MS** (EI, 70 eV) *m/z* 311 ([M+1]<sup>+</sup>, 22), 310 ([M]<sup>+</sup>, 100), 282 ([M-(CO)]<sup>+</sup>, 3), 267 ([M-(CO)-(CH<sub>3</sub>)]<sup>+</sup>, 5), 253 ([M-(*t*-Bu)]<sup>+</sup>, 9), 239 ([M-(*t*-Bu)-(CH<sub>2</sub>)]<sup>+</sup>, 35), 226 (21), 225 ([M-(CO)-(*t*-Bu)]<sup>+</sup>, 43), 211 ([M-(CO)-(CH<sub>2</sub>*t*-Bu)]<sup>+</sup>, 22), 186 ([FeCp<sub>2</sub>]<sup>+</sup>, 6), 153 (17), 133 (17), 121 ([FeCp]<sup>+</sup>, 58), 56 ([Fe]<sup>+</sup>, 32). **HRMS** (EI, 70 eV) calcd. for C<sub>18</sub>H<sub>22</sub>FeO 310.1020. Found 310.102. **Elem. Anal.** calcd. for C<sub>18</sub>H<sub>22</sub>FeO C 69.69, H 7.15. Found C 69.54, H 7.11.

## II.5. Synthesis of **9** through reduction and acetylation

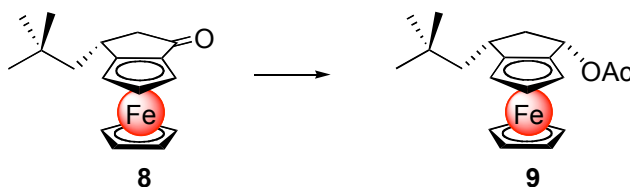

**General Procedure:** The  $\alpha$ -ferrocenylketone (1 equiv.) was dissolved in a 4:1 mixture of ethanol:dioxane. NaBH<sub>4</sub> (5 equiv.) was then added slowly in portions at room temperature. Conversion into the corresponding alcohol was easily observed by the change of the color of the solution, from red to yellow. An aqueous solution of NH<sub>4</sub>Cl was then added at 0°C and the alcohol was extracted with MTBE. The organic layer was washed with brine, dried over

Na<sub>2</sub>SO<sub>4</sub>, filtered and concentrated under vacuum. Crude products were pure enough to be directly used for the next step without further purification. The obtained  $\alpha$ -ferrocenylalcohol (1 equiv.) was dissolved in dry pyridine (6 mL/mmol) under argon atmosphere and acetic anhydride (2.3 mL/mmol) was added dropwise. After stirring overnight at room temperature, a saturated aqueous solution of NH<sub>4</sub>Cl was added. The acetate was extracted with CH<sub>2</sub>Cl<sub>2</sub> and the organic layer was washed successively with saturated aqueous NaHCO<sub>3</sub> and brine. The organic solution was then dried with Na<sub>2</sub>SO<sub>4</sub>, filtered and concentrated under vacuum. Purification by flash chromatography afforded the corresponding acetate.

Following the general procedure described above, ketone **8** was converted into the acetate **9** using the following amounts of starting materials and reagents: ketone **8** (105 mg, 1 equiv., 0.34 mmol), MeOH:dioxane (2 mL:500  $\mu$ L), NaBH<sub>4</sub> (64 mg, 5 equiv., 1.70 mmol). After 30 min and classical work-up, the alcohol (96 mg, d.r  $\geq$  92:8) was used without further purification. It was then reacted in pyridine (2mL) with acetic anhydride (780  $\mu$ L), 5h, rt. Purification by flash chromatography (cyclohexane/ethyl acetate 9/1) afforded **9** as a yellow oil (110 mg, 0.31 mmol, 90% over 2 steps).  $[\alpha]_D^{20}$  -117.5,  $[\alpha]_{365}^{20}$  -257.3,  $[\alpha]_{546}^{20}$  -148.1 (*c* 0.34, CHCl<sub>3</sub>). **IR** (neat)  $\nu$  3093 (w), 2952 (m), 2865 (w), 1737 (C=O, s), 1473 (w), 1365 (m), 1237 (s), 1105 (m), 1037 (m), 816 (m) cm<sup>-1</sup>. **<sup>1</sup>H NMR**  $\delta$  5.44 (t, *J* = 7.5, 1H, CHOAc), 4.27 (s, 5H, Cp), 4.13 (m, 1H, CHCp), 4.02 (m, 1H, CHCp), 3.92 (m, 1H, CHCp), 2.85 (m, 1H, CHHCHOAc), 2.43 (m, 1H, CHCH<sub>2</sub>*t*-Bu), 2.19 (s, 3H, CH<sub>3</sub>CO), 2.10 (m, 1H, CHHCHOAc), 1.88 (dd, *J* = 14.0, 3.3, 1H, CHH*t*-Bu), 1.58 (dd, *J* = 14.0, 7.6, 1H, CHH*t*-Bu), 1.00 (s, 9H, *t*-Bu). **<sup>13</sup>C NMR**  $\delta$  201.4 (C=O), 102.6 (CCp), 92.2 (CCp), 73.0 (CHOAc), 69.9 (CHCp), 68.6 (Cp), 60.3 (CHCp), 59.9 (CHCp), 50.1 (CH<sub>2</sub>*t*-Bu), 45.0 (CH<sub>2</sub>CHOAc), 31.5 (CHCH<sub>2</sub>*t*-Bu), 30.8 (C(CH<sub>3</sub>)<sub>3</sub>), 30.0 ((CH<sub>3</sub>)<sub>3</sub>C), 21.1 (CH<sub>3</sub>CO). **MS** (EI, 70 eV) *m/z* 355 ([M+1]<sup>+</sup>, 5), 354 ([M]<sup>+</sup>, 25), 294 (26), 237 (43), 180 (100), 121 ([FeCp]<sup>+</sup>, 51), 103 (26), 57 (30). **HRMS** (EI, 70 eV) calcd. for C<sub>20</sub>H<sub>26</sub>FeO<sub>2</sub> 354.1282. Found 354.129.

## II.6. General procedure for the synthesis of nucleosides using silylated nucleobases:

To a solution of the  $\alpha$ -ferrocenylacetate (1 equiv.) and TMS-protected nucleobase (4 equiv.) in dry CH<sub>2</sub>Cl<sub>2</sub> under argon atmosphere was added dropwise at 0°C TMSOTf (6 equiv.). The yellow solution was stirred in an ice bath for 0.5-1.5 h and then treated with a saturated solution of NaHCO<sub>3</sub>. The phases were separated and the aqueous phase washed with CH<sub>2</sub>Cl<sub>2</sub>. The combined organic layers were then washed with brine, dried with Na<sub>2</sub>SO<sub>4</sub>, filtered and the solvent removed under vacuum. Purification was achieved by flash chromatography.

## II.7. Synthesis of the cytosine derivative 10.

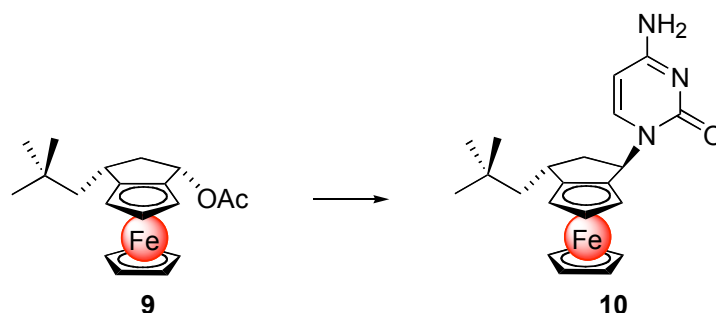

The general procedure for nucleobase introduction was used (see II.6.). Amounts: acetate **9** (194 mg, 1 equiv., 0.63 mmol), (TMS)<sub>2</sub>cytosine (643 mg, 4 equiv., 2.50 mmol), in CH<sub>2</sub>Cl<sub>2</sub> (14 mL), TMSOTf (685 μL, 6 equiv., 3.78 mmol), stirred for 1.5 h. Flash chromatography (ethyl acetate/methanol 95/5) afforded **10** as a yellow powder (205 mg, 0.51 mmol, 80% yield). **Mp**: decomposition starts at T>200°C.  $[\alpha]^{20}_{\text{D}} -203$  (*c* 0.29, CHCl<sub>3</sub>). **IR** (neat)  $\nu$  3345 (NHst, m), 3201 (NHst, m), 3092 (w), 2949 (m), 2860 (w), 1643 (C=Ost, s), 1522 (m), 1484 (s), 1395 (m), 1275 (m), 1105 (w), 1030 (w), 999 (w), 788 (m), 751 (w) cm<sup>-1</sup>. **<sup>1</sup>H NMR**  $\delta$  6.73 (d, *J* = 7.0, 1H, NCH=CHC), 5.67 (d, *J* = 6.2, 1H, NCH=CHC), 5.60 (d, *J* = 6.6, 1H, CHcytosine), 4.20 (m, 1H, CHCp), 4.17 (s, 5H, Cp), 4.85 (m, 1H, CHCp), 4.04 (m, 1H, CHCp), 2.61 (m, 1H, CHHCHcytosine), 2.40 (m, 2H, CHCHHCHcytosine), 1.80 (d, *J* = 13.7, 1H, CHH*t*-Bu), 1.45 (dd, *J* = 13.4, 6.3, 1H, CHH*t*-Bu), 0.91 (s, 9H, *t*-Bu). **MS** (EI, 70 eV) *m/z* 406 ([M+1]<sup>+</sup>, 2), 405 ([M]<sup>+</sup>, 7), 295 ([M-(cytosine)]<sup>+</sup>, 22), 294 (100), 238 ([M-(cytosine)-(*t*-Bu)]<sup>+</sup>, 19), 237 (62), 232 (13), 231 (51), 172 (11), 137 (21), 121 ([FeCp]<sup>+</sup>, 52), 103 (18), 69 (12), 57 (16), 56 ([Fe]<sup>+</sup>, 19). **HRMS** (EI, 70 eV) calcd. for C<sub>22</sub>H<sub>27</sub>FeN<sub>3</sub>O 405.1503. Found 405.150.

## II.8. Synthesis of the uracil derivative 11.

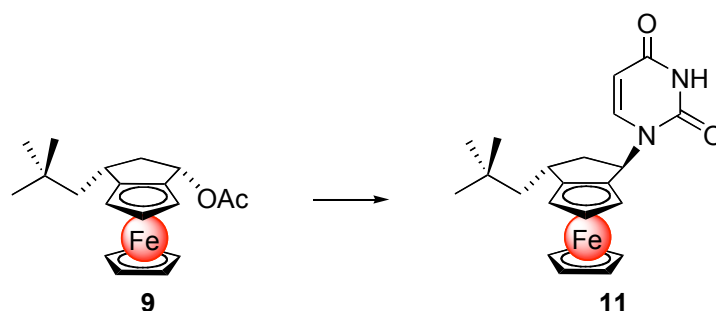

The general procedure for nucleobase introduction was used (see II.6.). Amounts: acetate **9** (64 mg, 0.21 mmol), (TMS)<sub>2</sub>uracil (213 mg, 0.83 mmol), in CH<sub>2</sub>Cl<sub>2</sub> (4.7 mL), TMSOTf (230 μL, 1.26 mmol), stirred for 0.5 h. Flash chromatography (ethyl acetate/methanol 1/1) afforded **11** as a yellow-orange powder (61 mg, 0.15 mmol, 72% yield). **Mp**: decomposition starts when T>220°C.  $[\alpha]^{20}_{\text{D}} -179$ ,  $[\alpha]^{20}_{546} -242$  (*c* 0.38, CHCl<sub>3</sub>). **IR** (neat)  $\nu$  3263 (NHst, w), 3094

(w), 2951 (w), 2863 (w), 1692 (C=Ost, s), 1680 (C=Ost, s), 1462 (w), 1377 (w), 1364 (w), 1258 (m), 1213 (w), 1175 (w), 1105 (w), 1000 (w), 815 (w), 765 (w)  $\text{cm}^{-1}$ .  $^1\text{H NMR}$   $\delta$  9.40 (br s, 1H, NH), 6.65 (d,  $J$  = 8.0, 1H,  $\text{NCH}=\text{CHCO}$ ), 5.63, (d,  $J$  = 6.5, 1H, CHN), 5.49 (d,  $J$  = 8.0, 1H,  $\text{NCH}=\text{CHCO}$ ), 4.23 (br s, 1H,  $\text{CHCp}$ ), 4.19 (s, 5H, Cp), 4.13 (br s, 1H,  $\text{CHCp}$ ), 4.07 (br s, 1H,  $\text{CHCp}$ ), 2.70 (m, 1H,  $\text{CHHCHN}$ ), 2.51 (m, 1H,  $\text{CHCH}_2t\text{-Bu}$ ), 2.43 (m, 1H,  $\text{CHHCHN}$ ), 1.83 (dd,  $J$  = 13.9, 2.5, 1H,  $\text{CHH}t\text{-Bu}$ ), 1.50 (dd,  $J$  = 14.0, 7.1, 1H,  $\text{CHH}t\text{-Bu}$ ), 0.95 (s, 9H,  $t\text{-Bu}$ ).  $^{13}\text{C NMR}$   $\delta$  163.5 (C=O), 151.0 ( $\text{NHC}=\text{ON}$ ), 140.9 ( $\text{NCH}=\text{CHCO}$ ), 103.3 (CCp), 101.5 ( $\text{NCH}=\text{CHCO}$ ), 86.9 (CCp), 71.5 ( $\text{CHCp}$ ), 69.4 (Cp), 61.9 ( $\text{CHCp}$ ), 61.7 ( $\text{CHCp}$ ), 57.3 (CHN), 50.0 ( $\text{CH}_2t\text{-Bu}$ ), 48.0 ( $\text{CH}_2\text{CHN}$ ), 31.9 ( $\text{CHCH}_2t\text{-Bu}$ ), 30.9 ( $\text{C}(\text{CH}_3)_3$ ), 30.1 ( $\text{CH}_3$ ). **MS** (EI, 70 eV)  $m/z$  407 ( $[\text{M}+1]^+$ , 13), 406 ( $[\text{M}]^+$ , 47), 295 ( $[\text{M}-(\text{uracil})]^+$ , 18), 294 (64), 238 ( $[\text{M}-(\text{uracil})-(t\text{-Bu})]^+$ , 32), 237 (72), 172 (21), 121 ( $[\text{FeCp}]^+$ , 100), 103 (48), 57 (16). **HRMS** (EI, 70 eV) calcd. for  $\text{C}_{22}\text{H}_{26}\text{FeN}_2\text{O}_2$  406.1343. Found 406.134.

## II.9. Synthesis of **13** and **14a** through Mukaiyama-Michael addition.

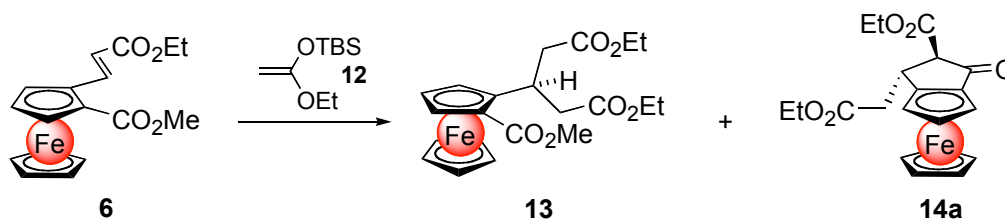

To a solution of trifluoromethanesulfonic acid (150  $\mu\text{L}$ , 0.57 equiv., 1.66 mmol) in  $\text{CH}_2\text{Cl}_2$  (15.3 mL) under argon atmosphere was added dropwise at  $-78^\circ\text{C}$  a 2 M solution of  $\text{AlMe}_3$  in toluene (290  $\mu\text{L}$ , 0.20 equiv., 0.58 mmol). After 5 min at this temperature, the mixture was stirred 30 min at room temperature. The mixture was then recooled to  $-78^\circ\text{C}$  and the ester **6** (1 g, 1 equiv., 2.92 mmol) in  $\text{CH}_2\text{Cl}_2$  (9.5 mL) was added dropwise, followed by the addition of the silylenolether **12**<sup>3</sup> (930 mg, 1.57 equiv., 4.58 mmol) in  $\text{CH}_2\text{Cl}_2$  (9.5 mL). The solution was stirred for 2.5 h at  $-78^\circ\text{C}$ <sup>4</sup> and MeOH was then added. After warming to  $0^\circ\text{C}$ , saturated  $\text{NH}_4\text{Cl}$  was added and the layers were separated. The aqueous layer was washed with  $\text{CH}_2\text{Cl}_2$  and the combined organic layers were washed with brine, dried over  $\text{MgSO}_4$ , filtered and concentrated under vacuum. Purification by flash chromatography (cyclohexane/ethyl acetate 3/1) afforded the addition product **13** as an orange oil (635 mg, 58%) and the cyclized product **14a** as a dark red oil (397 mg, 34%, 92% global yield).<sup>4</sup>

<sup>3</sup> Kita, Y.; Segawa, J.; Haruta, J.-i.; Yasuda, H.; Tamura, Y. *J. Chem. Soc., Perkin Trans. 1* **1982**, 1099.

<sup>4</sup> When the temperature was allowed to warm slowly to room temperature after 30 min. and stirred overnight at r.t., 43% of **14a** was isolated as a single diastereomer besides 47% of **13** (90 % global yield).

Data for addition product **13**:

$[\alpha]^{20}_{\text{D}} -42.6$ ,  $[\alpha]^{20}_{546} -52.4$  ( $c$  0.385,  $\text{CHCl}_3$ ). **IR** (neat)  $\nu$  3092 (w), 2977 (m), 2948 (m), 1731 (C=O, s), 1711 (C=O, s), 1445 (m), 1370 (m), 1340 (w), 1293 (m), 1216 (m), 1158 (s), 1090 (m), 818 (w)  $\text{cm}^{-1}$ .  **$^1\text{H}$  NMR**  $\delta$  4.65 (s, 1H, CHCp), 4.16 (s, 2 H, CHCp), 4.05 (q,  $J = 7.1$ , 2H,  $\text{CH}_2\text{CH}_3$ ), 4.02 (s, 5H, Cp), 3.90 (m, 1H,  $\text{CH}(\text{CH}_2\text{CO}_2\text{Et})_2$ ), 3.80 (q,  $J = 7.1$ ,  $\text{CH}_2\text{CH}_3$ ), 3.66 (s, 3H,  $\text{CH}_3\text{O}$ ), 2.90 (dd,  $J = 15.4$ , 4.1, 1H,  $\text{CHCHHCO}_2\text{Et}$ ), 2.78 (dd,  $J = 15.3$ , 9.7, 1H,  $\text{CHCHHCO}_2\text{Et}$ ), 2.43 (m, 2H,  $\text{CHCH}_2\text{CO}_2\text{Et}$ ), 1.17 (t,  $J = 7.1$ , 3H,  $\text{CH}_3\text{CH}_2$ ), 0.99 (t,  $J = 7.1$ , 3H,  $\text{CH}_3\text{CH}_2$ ).  **$^{13}\text{C}$  NMR**  $\delta$  172.0 (C=O), 171.8 (C=O), 171.3 (C=O), 93.5 (CCp), 70.5 (CHCp), 70.3 (CHCp), 69.9 (Cp), 69.0 (CHCp), 68.0 (CCp), 60.1 ( $\text{CH}_2\text{O}$ ), 59.6 ( $\text{CH}_2\text{O}$ ), 51.0 ( $\text{CH}_3\text{O}$ ), 39.9 ( $\text{CH}_2\text{CO}_2\text{Et}$ ), 37.9 ( $\text{CH}_2\text{CO}_2\text{Et}$ ), 30.8 ( $\text{CH}(\text{CH}_2\text{CO}_2\text{Et})_2$ ), 13.9 ( $\text{CH}_3\text{CH}_2$ ), 13.8 ( $\text{CH}_3\text{CH}_2$ ). **MS** (EI, 70 eV)  $m/z$  431 ( $[\text{M}+1]^+$ , 25), 430 ( $[\text{M}]^+$ , 100), 319 (17), 121 ( $[\text{FeCp}]^+$ , 24). **HRMS** (EI, 70 eV) calcd. for  $\text{C}_{21}\text{H}_{26}\text{FeO}_6$  430.1078. Found 430.108.

Data for cyclization product **14a**:

$[\alpha]^{20}_{\text{D}} +309$  ( $c$  0.085,  $\text{CHCl}_3$ ). **IR** (neat)  $\nu$  3105 (w), 2978 (w), 2928 (w), 1731 (C=O, s), 1703 (C=O, s), 1462 (w), 1425 (w), 1369 (w), 1327 (w), 1255 (m), 1154 (m), 1106 (w), 1026 (m), 822 (w)  $\text{cm}^{-1}$ .  **$^1\text{H}$  NMR**  $\delta$  4.64 (br s, 1H, CHCp), 4.55 (br s, 1H, CHCp), 4.41 (br s, 1H, CHCp), 4.19 (s, 5H, Cp), 4.15 (m, 4H,  $\text{CH}_2\text{CH}_3$ ), 3.73 (d,  $J = 6.2$ , 1H,  $\text{CHCO}$ ), 3.66 (m, 1H,  $\text{CHCHCO}$ ), 2.90 (dd,  $J = 15.6$ , 6.9, 1H,  $\text{CHHCHCHCO}$ ), 2.82 (dd,  $J = 15.8$ , 7.7, 1H,  $\text{CHHCHCHCO}$ ), 1.23 (m, 6H,  $\text{CH}_3\text{CH}_2$ ).  **$^{13}\text{C}$  NMR**  $\delta$  199.0 (C=O), 171.4 (C=O), 168.9 (C=O), 106.5 (CCp), 78.9 (CCp), 76.3 (CHCp), 70.5 (Cp), 66.2 (CHCp), 65.1 ( $\text{CHCO}_2\text{Et}$ ), 61.9 (CHCp), 61.5 ( $\text{CH}_2\text{CH}_3$ ), 60.9 ( $\text{CH}_2\text{CH}_3$ ), 40.3 ( $\text{CH}_2\text{CO}_2\text{Et}$ ), 34.0 ( $\text{CHCH}_2\text{CO}_2\text{Et}$ ), 14.2 ( $\text{CH}_3\text{CH}_2$ ). **MS** (EI, 70 eV)  $m/z$  399 ( $[\text{M}+1]^+$ , 15), 398 ( $[\text{M}]^+$ , 68), 353 (21), 352 (45), 325 (12), 324 (39), 252 (20), 121 ( $[\text{FeCp}]^+$ , 100), 103 (36), 89 (62), 56 ( $[\text{Fe}]^+$ , 58). **HRMS** (EI, 70 eV) calcd. for  $\text{C}_{20}\text{H}_{22}\text{FeO}_5$  398.0816. Found 398.082.

## II.10. Synthesis of **14a** and **14b** through group-selective Dieckmann cyclization.

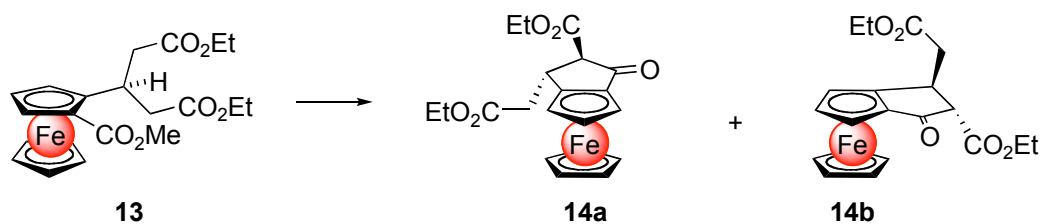

**Procedure A using LDA:** To a solution of triester **13** (1.3 g, 1 equiv., 3.03 mmol) in THF (10 mL) under argon atmosphere was added dropwise at  $-78^{\circ}\text{C}$  a solution of LDA in THF (prepared by a dropwise addition at  $-78^{\circ}\text{C}$  of a 1.6 M solution of *n*-BuLi (2.1 mL, 1.1 equiv., 3.33 mmol) onto DIPA (515  $\mu\text{L}$ , 1.2 equiv., 3.64 mmol) in THF (33 mL). The solution was then allowed to warm to  $0^{\circ}\text{C}$  for 15 min and used directly.). After the addition, the temperature was allowed to warm slowly to  $-60^{\circ}\text{C}$  and was stirred overnight at this temperature. The reaction mixture was quenched at  $0^{\circ}\text{C}$  in an ice bath with a saturated aqueous solution of  $\text{NH}_4\text{Cl}$ . The two phases were separated and the aqueous layer was washed with MTBE. The combined organic layers were then washed with brine, dried over  $\text{Na}_2\text{SO}_4$ , filtered and the solvents were removed under vacuum. Purification by flash chromatography (cyclohexane/ethyl acetate 3/1) gave a 1:1 mixture of the two cyclized diastereoisomers **14a** and **14b** as a red oils (1.18 g, 2.97 mmol, 98%).

**Procedure B using KH:** To a mixture of KH (30% in oil, washed with dry hexane, 770 mg, 4 equiv., 5.75 mmol) in THF (10 mL) under argon atmosphere was added the diester **13** (620 mg, 1 equiv., 1.44 mmol) in THF (36 mL). The reaction mixture was refluxed for 1 h. The red solution was then cooled to  $0^{\circ}\text{C}$  and water was added slowly and then a 1.0 M solution of aqueous HCl. The layers were separated and the aqueous layer was washed with MTBE. The combined organic layers was washed with  $\text{NaHCO}_3$ , brine, dried over  $\text{Na}_2\text{SO}_4$ , filtered and concentrated under vacuum. Purification by flash chromatography (cyclohexane/ethyl acetate 3/1) gave a 89:11 mixture of the two cyclized diastereoisomers **14a** and **14b** (462 mg, 1.16 mmol, 81%).

## II.11. Synthesis of diol **15** from **14a**.

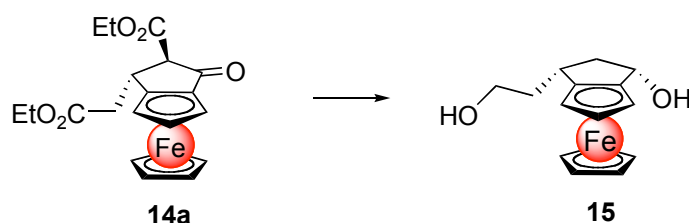

Under argon atmosphere, the diester **14a** (257 mg, 0.65 mmol) was dissolved in ethanol (10 mL) and to this solution was added at room temperature a 1 M aqueous solution of NaOH (10 mL). The mixture was then heated at  $+80^{\circ}\text{C}$  overnight. After cooling, MTBE was added and the phases separated. The organic layer was washed with a 1.0 M solution of NaOH (3x). The combined aqueous layers were then acidified with a 2.0 M solution of HCl and the carboxylic

acid extracted with MTBE (3x). The combined MTBE extracts were finally washed with brine, dried over  $\text{Na}_2\text{SO}_4$ , filtered and concentrated *in vacuo* to afford the intermediate mono-carboxylic acid. **MS** (EI, 70 eV)  $m/z$  299 ( $[\text{M}+1]^+$ , 15), 298 ( $[\text{M}]^+$ , 100), 121 ( $[\text{FeCp}]^+$ , 23), 56 ( $[\text{Fe}]^+$ , 25). **HRMS** (EI, 70 eV) calcd. for  $\text{C}_{15}\text{H}_{14}\text{FeO}_3$  298.0292. Found 298.029. The crude carboxylic acid (173 mg, 1 equiv., 0.58 mmol) was dissolved in THF (5 mL) under argon atmosphere and the solution was cooled at  $0^\circ\text{C}$ . A 1 M solution of  $\text{LiAlH}_4$  in ether (1.74 mL, 3 equiv., 1.74 mmol) was added dropwise. Temperature was allowed to warm slowly to room temperature and the mixture was stirred overnight at room temperature. An aqueous solution of NaOH 1N was then added carefully. The mixture was then filtered through a pad of celite, rinsed many times with  $\text{CH}_2\text{Cl}_2$  and the filtrate was concentrated under vacuum. Purification by flash chromatography (cyclohexane/ethyl acetate 1/1) afforded a yellow oil which solidifies (68 mg, 0.24 mmol, 41% for 2 steps). An analytical sample of **15** could be prepared by recrystallization in 1,2-dichloroethane. **Mp** ( $\text{ClCH}_2\text{CH}_2\text{Cl}$ ):  $+115$ - $117^\circ\text{C}$ .  $[\alpha]_D^{20} +16.5$ ,  $[\alpha]_{546}^{20} +21.6$ , ( $c$  0.43,  $\text{CHCl}_3$ ). **IR** (neat)  $\nu$  3327 (OHst, m), 3090 (w), 2922 (m), 2851 (m), 1725 (w), 1673 (w), 1447 (m), 1410 (m), 1327 (m), 1260 (s), 1104 (s), 1079 (s), 1040 (s), 1007 (s), 997 (s), 884 (m), 804 (s), 734 (m)  $\text{cm}^{-1}$ .  **$^1\text{H}$  NMR**  $\delta$  4.52 (q,  $J = 7.0$ , 1H,  $\text{CHOH}$ ), 4.28 (s, 5H, Cp), 4.13 (br t, 1H,  $\text{CHCp}$ ), 4.02 (d,  $J = 2.0$ , 1H,  $\text{CHCp}$ ), 3.97 (d,  $J = 2.0$ , 1H,  $\text{CHCp}$ ), 3.77 (t,  $J = 6.8$ , 2H,  $\text{CH}_2\text{OH}$ ), 2.73 (dt,  $J = 12.1, 6.8$ , 1H,  $\text{CHHCHOH}$ ), 2.44 (m, 1H,  $\text{CHCH}_2\text{CH}_2\text{OH}$ ), 2.04 (hex,  $J = 6.8$ , 1H,  $\text{CHHCH}_2\text{OH}$ ), 1.86 (m, 3H,  $\text{CHHCHOH} + \text{CHHCH}_2\text{OH} + \text{OH}$ ), 1.59 (br s, 1H, OH).  **$^{13}\text{C}$  NMR**  $\delta$  100.3 (CCp), 98.3 (CCp), 70.0 (CHCp), 69.3 (CHOH), 68.3 (Cp), 61.8 ( $\text{CH}_2\text{OH}$ ), 60.7 (CHCp), 58.9 (CHCp), 47.1 ( $\text{CH}_2\text{CHOH}$ ), 38.7 ( $\text{CH}_2\text{CH}_2\text{OH}$ ), 32.2 ( $\text{CHCH}_2\text{CH}_2\text{OH}$ ). **MS** (EI, 70 eV)  $m/z$  313 ( $[\text{M}+1]^+$ , 17), 312 ( $[\text{M}]^+$ , 91), 284 (10), 247 ( $[\text{M}-(\text{Cp})]^+$ , 23), 239 ( $[\text{M}-(\text{CH}_2\text{CO}_2\text{Me})]^+$ , 18), 215 (24), 188 ( $[\text{M}-(\text{Cp})-(\text{CO}_2\text{Me})]^+$ , 7), 175 (19), 121 ( $[\text{FeCp}]^+$ , 100), 103 (31), 56 ( $[\text{Fe}]^+$ , 98).

## II.12. Synthesis of 16 via selective mono-protection of 15.

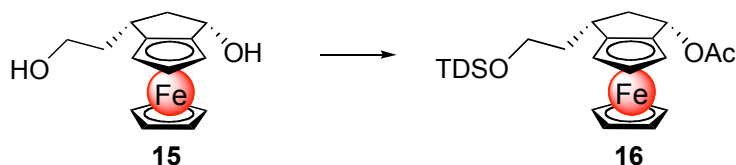

To a solution of diol **15** (80 mg, 1 equiv., 0.28 mmol) and DMAP (3.6 mg, 0.1 equiv., 0.03 mmol) in pyridine (2.8 mL) was added dropwise  $\text{TDSCl}$  (56  $\mu\text{L}$ , 1 equiv., 0.28 mmol) under argon atmosphere. After 2 h at room temperature, water and then 1 N HCl were added successively. The product was extracted with MTBE and the organic phase was washed with

brine, dried over  $\text{MgSO}_4$ , filtered and concentrated under vacuum. The crude alcohol was dissolved in dry pyridine (1.7 mL) under argon atmosphere and acetic anhydride (640  $\mu\text{L}$ ) was added dropwise. After stirring overnight at room temperature, a saturated aqueous solution of  $\text{NH}_4\text{Cl}$  was added. The acetate was extracted with MTBE and the organic layer was washed successively with saturated aqueous  $\text{NaHCO}_3$  and brine. The organic solution was then dried with  $\text{Na}_2\text{SO}_4$ , filtered and concentrated under vacuum. Purification by flash chromatography (cyclohexane/ethyl acetate 4/1) afforded **16** as a yellow oil (113 mg, 0.24 mmol, 86% for 2 steps).  $[\alpha]_D^{20}$  -87.4,  $[\alpha]_{546}^{20}$  -115.2,  $[\alpha]_{365}^{20}$  -156.4 ( $c$  0.385,  $\text{CHCl}_3$ ). **IR** (neat)  $\nu$  2955 (m), 2860 (w), 1734 (C=Ost, s), 1463 (w), 1367 (w), 1237 (s), 1094 (s), 1036 (m), 816 (s), 776 (m), 613 (w)  $\text{cm}^{-1}$ .  **$^1\text{H}$  NMR**  $\delta$  5.44 (t,  $J$  = 7.3, 1H, CHOAc), 4.22 (s, 5H, Cp), 4.09 (t,  $J$  = 2.2, 1H, CHCp), 3.95 (d,  $J$  = 2.2, 1H, CHCp), 3.74 (d,  $J$  = 2.1, 1H, CHCp), 3.72 (t,  $J$  = 6.6, 2H,  $\text{CH}_2\text{O}$ ), 2.74 (dt,  $J$  = 12.2, 7.0, 1H,  $\text{CHHCHOAc}$ ), 2.53 (m, 1H,  $\text{CHCH}_2\text{CH}_2\text{O}$ ), 2.15 (s, 3H,  $\text{CH}_3\text{CO}$ ), 2.03 (m, 2H,  $\text{CHHCHOAc}$  +  $\text{CHHCH}_2\text{O}$ ), 1.85 (m, 1H,  $\text{CHHCH}_2\text{O}$ ), 1.63 (hep,  $J$  = 6.8, 1H,  $\text{CH}(\text{CH}_3)_2$ ), 0.88 (d,  $J$  = 6.9, 6H,  $(\text{CH}_3)_2\text{CH}$ ), 0.85 (s, 6H,  $(\text{CH}_3)_2\text{C}$ ), 0.11 (s, 6H,  $\text{CH}_3\text{Si}$ ).  **$^{13}\text{C}$  NMR**  $\delta$  170.9 (C=O), 101.1 (CCp), 93.0 (CCp), 72.6 (CHOAc), 69.9 (CHCp), 68.5 (Cp), 61.7 ( $\text{CH}_2\text{O}$ ), 60.4 (CHCp), 60.2 (CHCp), 42.3 ( $\text{CH}_2\text{CHOAc}$ ), 38.9 ( $\text{CH}_2\text{CH}_2\text{O}$ ), 34.2 ( $\text{CH}(\text{CH}_3)_2$ ), 31.8 ( $\text{CH}(\text{CH}_2)_2\text{O}$ ), 25.1 ( $\text{C}(\text{CH}_3)_2$ ), 21.0 ( $\text{CH}_3\text{CO}$ ), 20.4 ( $(\text{CH}_3)_2\text{CH}$ ), 18.5 ( $(\text{CH}_3)_2\text{C}$ ), -3.34 ( $\text{CH}_3\text{Si}$ ), -3.37 ( $\text{CH}_3\text{Si}$ ). **MS** (EI, 70 eV)  $m/z$  470 ( $[\text{M}]^+$ , 26), 410 (100), 250 (39), 133 (20). **HRMS** (EI, 70 eV) calcd. for  $\text{C}_{25}\text{H}_{38}\text{FeO}_3\text{Si}$  470.1940. Found 470.194.

### II.13. Synthesis of the cytosine derivative 17.

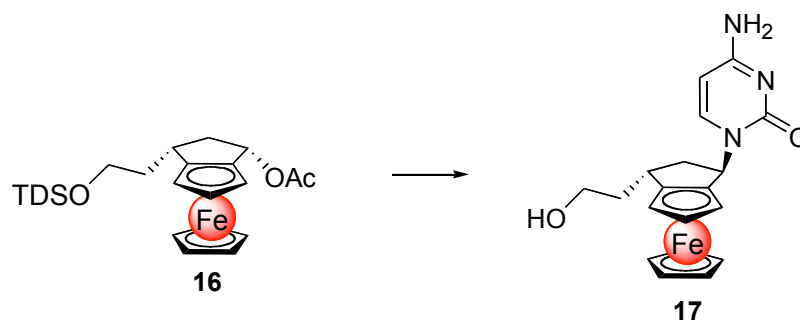

The general procedure for nucleobase introduction was used (see II.6.). Amounts: acetate **16** (85 mg, 1 equiv., 0.18 mmol),  $(\text{TMS})_2\text{cytosine}$  (186 mg, 4 equiv., 0.72 mmol), in  $\text{CH}_2\text{Cl}_2$  (4 mL),  $\text{TMSOTf}$  (195  $\mu\text{L}$ , 6 equiv., 1.08 mmol), stirred for 0.5 h. Flash chromatography (ethyl acetate/methanol 4/1) afforded the deprotected alcohol **17** as a major product, yellow solid (48 mg, 0.13 mmol, 75%) and a little amount of the TDS-protected ferrocenyl nucleoside analog

**18**, yellow solid (3 mg, 0.006 mmol, 3 %). **Mp**: decomposition at 240°C.  $[\alpha]^{20}_{\text{D}} -196$ ,  $[\alpha]^{20}_{546} -275$  (*c* 0.255, EtOH). **IR** (neat)  $\nu$  3328 (OHst, m), 3180 (NHst, m), 2924 (w), 2860 (w), 1635 (C=Ost, s), 1602 (s), 1521 (m), 1482 (s), 1395 (m), 1276 (s), 1184 (w), 1105 (w), 1051 (w), 999 (w), 787 (m)  $\text{cm}^{-1}$ .  **$^1\text{H}$  NMR** ( $\text{CD}_3\text{OD}$ )  $\delta$  6.86 (d,  $J = 7.4$ , 1H, NCH=CHC), 5.70 (d,  $J = 7.4$ , 1H, NCH=CHC), 5.66 (d,  $J = 6.4$ , 1H, CHN), 4.29 (t,  $J = 2.2$ , 1H, CHCp), 4.25 (s, 5H, Cp), 4.20 (d,  $J = 2.2$ , 1H, CHCp), 4.18 (d,  $J = 2.2$ , 1H, CHCp), 3.73 (br t, 2H,  $\text{CH}_2\text{OH}$ ), 2.72 (m, 2H, CHHCHN + CHCH $_2$ CH $_2$ OH), 2.35 (m, 1H, CHHCHN), 2.13 (hex,  $J = 6.6$ , 1H, CHHCH $_2$ OH), 1.91 (hex,  $J = 6.8$ , 1H, CHHCH $_2$ OH).  **$^{13}\text{C}$  NMR** ( $\text{CD}_3\text{OD}$ )  $\delta$  167.2 (NH $_2$ -C=N), 159.0 (C=O), 143.3 (NCH=CHC), 103.1 (CCp), 95.7 (NCH=CHC), 90.0 (CCp), 76.6 (CHCp), 70.4 (Cp), 63.1 (CHCp), 62.8 (CHCp), 61.8 ( $\text{CH}_2\text{OH}$ ), 59.0 (CHN), 46.5 ( $\text{CH}_2\text{CHN}$ ), 39.4 ( $\text{CH}_2\text{CH}_2\text{OH}$ ), 33.5 (CHCH $_2$ CH $_2$ OH). **MS** (EI, 70 eV)  $m/z$  379 ( $[\text{M}]^+$ , 8), 314 ( $[\text{M}-(\text{Cp})]^+$ , 2), 269 ( $[\text{M}-(\text{cytosine})]^+$  and/or  $[\text{M}-(\text{Cp})-(\text{CH}_2\text{CH}_2\text{OH})]^+$ , 21), 268 ( $[\text{M}-(\text{cytosine})-1]^+$  and/or  $[\text{M}-(\text{Cp})-(\text{CH}_2\text{CH}_2\text{OH})-1]^+$ , 100), 231 (27), 210 (17), 172 (19), 137 (18), 121 ( $[\text{FeCp}]^+$ , 43), 56 ( $[\text{Fe}]^+$ , 29). **HRMS** (EI, 70 eV) calcd. for  $\text{C}_{19}\text{H}_{21}\text{FeN}_3\text{O}_2$  379.0983. Found 379.098.

#### II.14. Synthesis of the cytosine derivative 18.

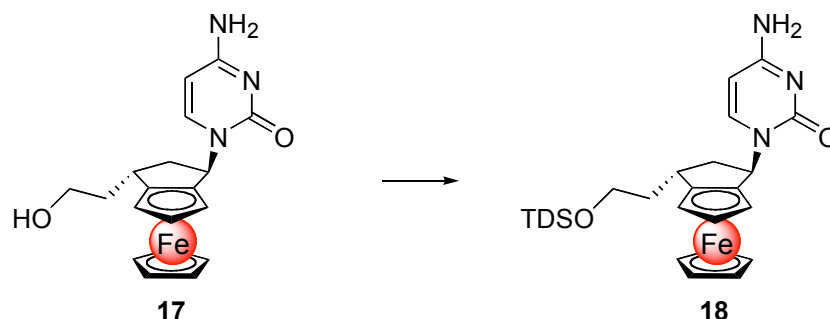

Under argon atmosphere, the alcohol **17** (32 mg, 1 equiv., 0.084 mmol), imidazole (14 mg, 2.4 equiv., 0.20 mmol) and DMAP (0.9 mg, 0.09 equiv., 0.008 mmol) were dissolved in dry DMF (800  $\mu\text{L}$ ). TDSCl (20  $\mu\text{L}$ , 1.2 equiv., 0.100 mmol) was added dropwise and the mixture was stirred overnight at room temperature. Saturated aqueous  $\text{NH}_4\text{Cl}$  was then added and the product was extracted with  $\text{CH}_2\text{Cl}_2$ . The organic layer was washed with brine, dried over  $\text{Na}_2\text{SO}_4$ , filtered and concentrated under vacuum. Purification by flash chromatography (ethyl acetate then ethyl acetate/methanol 95/5) afforded **18** as a yellow powder (40 mg, 0.077 mmol, 92%). **Mp**: decomposition starts when  $T > 200^\circ\text{C}$ .  $[\alpha]^{20}_{\text{D}} -174$ ,  $[\alpha]^{20}_{546} -241$  (*c* 0.30,  $\text{CHCl}_3$ ). **IR** (neat)  $\nu$  3349 (w), 3146 (w), 3092 (w), 2953 (m), 2860 (m), 1643 (s), 1624 (s), 1517 (m), 1484 (s), 1392 (m), 1277 (m), 1249 (m), 1105 (m), 829 (m), 776 (m)  $\text{cm}^{-1}$ .  **$^1\text{H}$**

**NMR**  $\delta$  6.68 (d,  $J = 7.7$ , 1H, NCH=CHC), 6.60-5.80 (br s, 2H, NH<sub>2</sub>), 5.69 (d,  $J = 6.5$ , 1H, CHN), 5.52 (d,  $J = 7.3$ , 1H, NCH=CHC), 4.20 (t,  $J = 2.3$ , 1H, CHCp), 4.17 (s, 5H, Cp), 4.08 (d,  $J = 2.2$ , 1H, CHCp), 4.05 (d,  $J = 2.2$ , 1H, CHCp), 3.68 (t,  $J = 6.7$ , 2H, CH<sub>2</sub>O), 2.61 (m, 2H, CHHCHN + CHCH<sub>2</sub>CHN), 2.34 (dd,  $J = 12.3$ , 5.7, 1H, CHHCHN), 2.00 (hex,  $J = 6.6$ , 1H, CHHCH<sub>2</sub>O), 1.82 (hex,  $J = 6.6$ , 1H, CHHCH<sub>2</sub>O), 1.58 (sep,  $J = 7.0$ , 1H, CH(CH<sub>3</sub>)<sub>2</sub>), 0.83 (d,  $J = 6.8$ , 6H, (CH<sub>3</sub>)<sub>2</sub>CH), 0.81 (s, 6H, (CH<sub>3</sub>)<sub>2</sub>C), 0.08 (s, 3H, CH<sub>3</sub>Si), 0.07 (s, 3H, CH<sub>3</sub>Si). **<sup>13</sup>C NMR**  $\delta$  165.3 (NH<sub>2</sub>-C=N), 156.6 (C=O), 142.0 (NCH=CHC), 101.8 (CCp), 93.4 (NCH=CHC), 88.8 (CCp), 71.1 (CHCp), 69.2 (Cp), 61.7 (2×CHCp), 61.6 (CH<sub>2</sub>O), 57.2 (CHN), 45.4 (CH<sub>2</sub>CHN), 38.2 (CH<sub>2</sub>CH<sub>2</sub>O), 34.2 (CH(CH<sub>3</sub>)<sub>2</sub>), 32.0 (CH(CH<sub>2</sub>)<sub>2</sub>O), 25.1 (C(CH<sub>3</sub>)<sub>2</sub>), 20.4 ((CH<sub>3</sub>)<sub>2</sub>CH), 18.5 ((CH<sub>3</sub>)<sub>2</sub>C), -3.4 (CH<sub>3</sub>Si). **MS** (EI, 70 eV)  $m/z$  521 ([M]<sup>+</sup>, 5), 411 ([M-(cytosine)]<sup>+</sup> and/or [M-(Cp)-(CH<sub>2</sub>CH<sub>2</sub>OH)]<sup>+</sup>, 32), 410 ([M-(cytosine)-1]<sup>+</sup> and/or [M-(Cp)-(CH<sub>2</sub>CH<sub>2</sub>OH)-1]<sup>+</sup>, 100), 250 (100), 231 (97), 168 (37), 121 ([FeCp]<sup>+</sup>, 79), 73 (82). **HRMS** (EI, 70 eV) calcd. for C<sub>27</sub>H<sub>39</sub>FeN<sub>3</sub>O<sub>2</sub>Si 521.2161. Found 521.216.

## X-ray Crystallographic Data for Compound 6

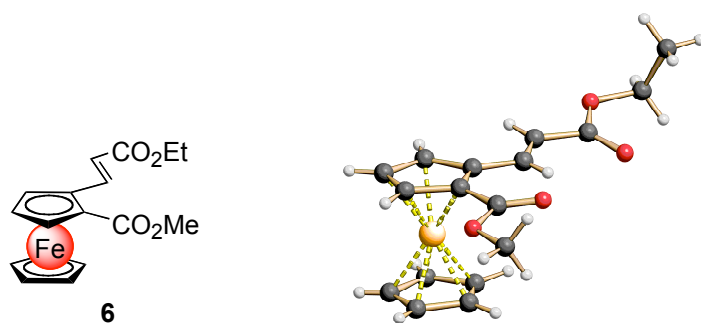Table 1. Crystal data and structure refinement for **6**.

|                                   |                                                                                                                        |
|-----------------------------------|------------------------------------------------------------------------------------------------------------------------|
| Identification code               | z_pj193                                                                                                                |
| Empirical formula                 | C17 H18 Fe O4                                                                                                          |
| Formula weight                    | 342.16                                                                                                                 |
| Temperature                       | 100(2) K                                                                                                               |
| Wavelength                        | 0.71073 Å                                                                                                              |
| Crystal system, space group       | Monoclinic, P21                                                                                                        |
| Unit cell dimensions              | a = 9.7914(6) Å    alpha = 90 deg.<br>b = 8.0967(3) Å    beta = 114.960(2) deg.<br>c = 10.6853(7) Å    gamma = 90 deg. |
| Volume                            | 767.99(7) Å <sup>3</sup>                                                                                               |
| Z, Calculated density             | 2, 1.480 Mg/m <sup>3</sup>                                                                                             |
| Absorption coefficient            | 0.997 mm <sup>-1</sup>                                                                                                 |
| F(000)                            | 356                                                                                                                    |
| Crystal size                      | 3 x .2 x .2 mm                                                                                                         |
| Theta range for data collection   | 2.10 to 26.99 deg.                                                                                                     |
| Limiting indices                  | -10 ≤ h ≤ 12, -8 ≤ k ≤ 10, -11 ≤ l ≤ 13                                                                                |
| Reflections collected / unique    | 3908 / 3053 [R(int) = 0.0270]                                                                                          |
| Reflection observed [I > 2σ(I)]   | 2640                                                                                                                   |
| Completeness to theta = 26.99     | 99.6 %                                                                                                                 |
| Absorption correction             | None                                                                                                                   |
| Refinement method                 | Full-matrix least-squares on F <sup>2</sup>                                                                            |
| Data / restraints / parameters    | 3053 / 1 / 249                                                                                                         |
| Goodness-of-fit on F <sup>2</sup> | 0.967                                                                                                                  |
| Final R indices [I > 2σ(I)]       | R1 = 0.0365, wR2 = 0.0669                                                                                              |
| R indices (all data)              | R1 = 0.0465, wR2 = 0.0694                                                                                              |
| Absolute structure parameter      | 0.004(17)                                                                                                              |
| Largest diff. peak and hole       | 0.268 and -0.310 e.Å <sup>-3</sup>                                                                                     |

Table 2. Atomic coordinates ( $\times 10^4$ ) and equivalent isotropic displacement parameters ( $\text{\AA}^2 \times 10^3$ ) for **6**.

$U(\text{eq})$  is defined as one third of the trace of the orthogonalized  $U_{ij}$  tensor.

|       | x        | y        | z        | $U(\text{eq})$ |
|-------|----------|----------|----------|----------------|
| Fe(1) | 7111(1)  | 904(1)   | 2796(1)  | 18(1)          |
| C(1)  | 1232(3)  | 736(4)   | 33(3)    | 17(1)          |
| O(3)  | 793(2)   | 409(2)   | 906(2)   | 22(1)          |
| O(4)  | 331(2)   | 1316(2)  | -1236(2) | 20(1)          |
| O(5)  | 7519(3)  | -2996(3) | 4651(2)  | 26(1)          |
| C(6)  | 5377(4)  | -520(3)  | 1511(3)  | 16(1)          |
| C(7)  | 3820(4)  | -233(3)  | 1266(3)  | 16(1)          |
| C(8)  | 6472(4)  | -1484(4) | 2603(4)  | 17(1)          |
| C(9)  | 6225(4)  | -2403(4) | 3692(3)  | 20(1)          |
| C(10) | 2788(3)  | 554(4)   | 190(3)   | 19(1)          |
| C(11) | 7889(4)  | -1347(4) | 2510(4)  | 21(1)          |
| O(12) | 5024(3)  | -2606(3) | 3727(2)  | 32(1)          |
| C(13) | 7674(4)  | -307(4)  | 1382(4)  | 23(1)          |
| C(14) | 6152(4)  | 195(4)   | 770(3)   | 20(1)          |
| C(15) | 7416(4)  | -3924(5) | 5762(3)  | 31(1)          |
| C(16) | -1263(4) | 1475(4)  | -1547(4) | 19(1)          |
| C(1A) | -2054(4) | -159(4)  | -1997(4) | 29(1)          |
| C(2A) | 6207(5)  | 2757(4)  | 3499(4)  | 31(1)          |
| C(3A) | 8594(5)  | 1803(5)  | 4660(5)  | 45(1)          |
| C(4A) | 7128(5)  | 1785(4)  | 4585(4)  | 34(1)          |
| C(5A) | 8551(6)  | 2825(6)  | 3577(6)  | 55(2)          |
| C(6A) | 7079(6)  | 3422(5)  | 2869(5)  | 42(1)          |

Table 3. Anisotropic displacement parameters ( $\text{\AA}^2 \times 10^3$ ) for **6**.

The anisotropic displacement factor exponent takes the form:

$$-2 \pi^2 [ h^2 a^{*2} U_{11} + \dots + 2 h k a^* b^* U_{12} ]$$

|       | U11   | U22   | U33   | U23    | U13    | U12    |
|-------|-------|-------|-------|--------|--------|--------|
| Fe(1) | 16(1) | 19(1) | 19(1) | -2(1)  | 9(1)   | -1(1)  |
| C(1)  | 16(1) | 13(2) | 21(2) | -3(2)  | 7(1)   | -2(2)  |
| O(3)  | 18(1) | 30(2) | 21(1) | 3(1)   | 10(1)  | 2(1)   |
| O(4)  | 16(1) | 25(1) | 20(1) | 6(1)   | 7(1)   | 2(1)   |
| O(5)  | 28(1) | 25(1) | 22(1) | 8(1)   | 8(1)   | 4(1)   |
| C(6)  | 17(2) | 19(2) | 13(2) | -4(1)  | 7(1)   | -4(1)  |
| C(7)  | 17(2) | 19(2) | 14(2) | -3(1)  | 8(2)   | -4(1)  |
| C(8)  | 13(2) | 19(2) | 18(2) | -1(1)  | 4(2)   | 2(1)   |
| C(9)  | 23(2) | 15(2) | 21(2) | -2(1)  | 9(2)   | 0(1)   |
| C(10) | 19(2) | 22(2) | 18(2) | 1(1)   | 9(1)   | -1(1)  |
| C(11) | 18(2) | 23(2) | 23(2) | -1(1)  | 10(2)  | 4(2)   |
| O(12) | 23(1) | 40(1) | 33(2) | 12(1)  | 12(1)  | -2(1)  |
| C(13) | 20(2) | 30(2) | 24(2) | -4(2)  | 16(2)  | 0(1)   |
| C(14) | 21(2) | 25(2) | 17(2) | -1(2)  | 11(2)  | -1(1)  |
| C(15) | 43(2) | 26(2) | 20(2) | 3(2)   | 10(2)  | 2(2)   |
| C(16) | 13(2) | 21(2) | 22(2) | 4(1)   | 6(2)   | 3(1)   |
| C(1A) | 24(2) | 25(2) | 28(2) | 1(2)   | 1(2)   | -3(2)  |
| C(2A) | 28(2) | 27(2) | 38(2) | -13(2) | 12(2)  | 3(2)   |
| C(3A) | 34(3) | 35(2) | 41(3) | -19(2) | -10(2) | 5(2)   |
| C(4A) | 54(3) | 24(2) | 26(2) | -8(2)  | 20(2)  | -6(2)  |
| C(5A) | 47(3) | 49(3) | 89(4) | -42(3) | 49(3)  | -33(2) |
| C(6A) | 77(4) | 15(2) | 31(3) | -1(2)  | 20(3)  | -6(2)  |

Table 4. Hydrogen coordinates ( $\times 10^4$ ) and isotropic displacement parameters ( $\text{\AA}^2 \times 10^3$ ) for **6**.

|        | x         | y         | z         | U(eq)  |
|--------|-----------|-----------|-----------|--------|
| H(15A) | 7112      | -3187     | 6327      | 46     |
| H(15B) | 8399      | -4412     | 6336      | 46     |
| H(15C) | 6667      | -4804     | 5377      | 46     |
| H(1A1) | -1874     | -594      | -2770     | 44     |
| H(1A2) | -3138     | -7        | -2289     | 44     |
| H(1A3) | -1664     | -940      | -1225     | 44     |
| H(1)   | 2990(30)  | 980(50)   | -520(30)  | 24(7)  |
| H(2)   | 5750(30)  | 880(50)   | -20(30)   | 21(7)  |
| H(3)   | 8850(40)  | -1850(40) | 3120(30)  | 24(9)  |
| H(4)   | -1400(30) | 1810(30)  | -760(30)  | 15(8)  |
| H(5)   | 8440(40)  | -100(40)  | 1140(30)  | 33(10) |
| H(6)   | 3590(40)  | -670(40)  | 1900(30)  | 19(8)  |
| H(7)   | 9510(50)  | 1070(70)  | 5290(40)  | 80(14) |
| H(9)   | -1650(30) | 2360(40)  | -2320(30) | 12(8)  |
| H(3A)  | 5050(50)  | 2920(50)  | 3100(40)  | 64(13) |
| H(7A)  | 6810(50)  | 4130(60)  | 2090(40)  | 69(14) |
| H(5A)  | 6860(40)  | 1230(50)  | 5240(40)  | 46(11) |
| H(9A)  | 9240(60)  | 3050(60)  | 3400(50)  | 81(19) |

### X-ray Crystallographic Data for Compound 15

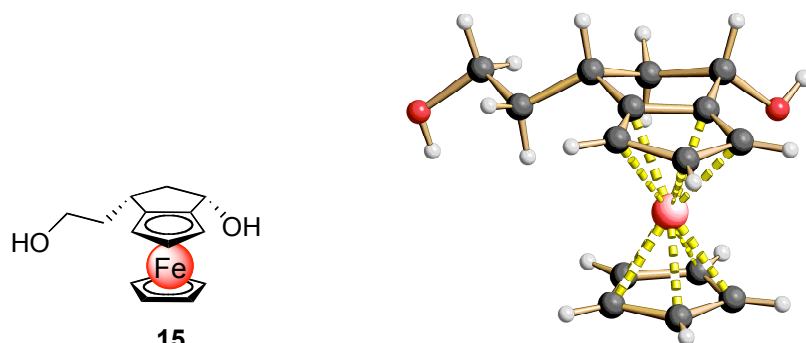

Table 5. Crystal data and structure refinement for **15**.

|                                   |                                                                                                                 |
|-----------------------------------|-----------------------------------------------------------------------------------------------------------------|
| Identification code               | pj213                                                                                                           |
| Empirical formula                 | C <sub>15</sub> H <sub>18</sub> Fe O <sub>2</sub>                                                               |
| Formula weight                    | 286.14                                                                                                          |
| Temperature                       | 100(2) K                                                                                                        |
| Wavelength                        | 0.71073 Å                                                                                                       |
| Crystal system, space group       | Orthorhombic, P212121                                                                                           |
| Unit cell dimensions              | a = 7.8262(5) Å    alpha = 90 deg.<br>b = 12.4546(10) Å    beta = 90 deg.<br>c = 26.589(2) Å    gamma = 90 deg. |
| Volume                            | 2591.7(3) Å <sup>3</sup>                                                                                        |
| Z, Calculated density             | 8, 1.467 Mg/m <sup>3</sup>                                                                                      |
| Absorption coefficient            | 1.154 mm <sup>-1</sup>                                                                                          |
| F(000)                            | 1200                                                                                                            |
| Crystal size                      | .3 x .1 x .1 mm                                                                                                 |
| Theta range for data collection   | 2.24 to 26.99 deg.                                                                                              |
| Limiting indices                  | -9 ≤ h ≤ 6, -15 ≤ k ≤ 14, -15 ≤ l ≤ 33                                                                          |
| Reflections collected / unique    | 8433 / 5113 [R(int) = 0.0522]                                                                                   |
| Reflection observed [I > 2σ(I)]   | 2996                                                                                                            |
| Completeness to theta = 26.99     | 96.5 %                                                                                                          |
| Absorption correction             | None                                                                                                            |
| Refinement method                 | Full-matrix least-squares on F <sup>2</sup>                                                                     |
| Data / restraints / parameters    | 5113 / 0 / 329                                                                                                  |
| Goodness-of-fit on F <sup>2</sup> | 0.894                                                                                                           |
| Final R indices [I > 2σ(I)]       | R1 = 0.0460, wR2 = 0.0759                                                                                       |
| R indices (all data)              | R1 = 0.1063, wR2 = 0.0881                                                                                       |
| Absolute structure parameter      | 0.007(19)                                                                                                       |
| Largest diff. peak and hole       | 0.536 and -0.460 e.Å <sup>-3</sup>                                                                              |

Table 6. Atomic coordinates ( $\times 10^4$ ) and equivalent isotropic displacement parameters ( $\text{\AA}^2 \times 10^3$ ) for **15**.

U(eq) is defined as one third of the trace of the orthogonalized U<sub>ij</sub> tensor.

|       | x        | y        | z        | U(eq) |
|-------|----------|----------|----------|-------|
| Fe(2) | 9034(1)  | 7602(1)  | 2028(1)  | 37(1) |
| O(1)  | 7350(4)  | 8359(3)  | 3254(1)  | 38(1) |
| C(2)  | 6782(5)  | 7627(4)  | 2411(2)  | 33(1) |
| C(4)  | 7321(6)  | 6560(4)  | 2336(2)  | 40(1) |
| C(9)  | 5881(5)  | 9249(3)  | 1989(2)  | 35(1) |
| C(11) | 11262(6) | 7244(4)  | 2380(2)  | 51(2) |
| C(12) | 10856(6) | 8326(4)  | 2457(2)  | 43(1) |
| C(18) | 6540(5)  | 8126(4)  | 1936(2)  | 37(1) |
| C(19) | 6251(6)  | 8388(4)  | 2818(2)  | 35(1) |
| C(21) | 5969(6)  | 11194(4) | 1670(2)  | 43(1) |
| C(22) | 10749(5) | 8856(4)  | 1988(2)  | 46(1) |
| O(25) | 6896(3)  | 11922(3) | 1356(1)  | 46(1) |
| C(30) | 6982(5)  | 7372(4)  | 1558(2)  | 41(1) |
| C(31) | 7458(6)  | 6401(4)  | 1801(2)  | 44(1) |
| C(32) | 6295(5)  | 9493(4)  | 2553(2)  | 37(1) |
| C(34) | 11447(6) | 7080(5)  | 1850(2)  | 56(2) |
| C(38) | 11120(6) | 8064(5)  | 1621(2)  | 54(2) |
| C(42) | 6622(6)  | 10048(4) | 1614(2)  | 42(1) |
| Fe(1) | 2509(1)  | 5462(1)  | 352(1)   | 36(1) |
| C(3)  | 222(6)   | 5495(5)  | -13(2)   | 50(2) |
| C(5)  | 4944(5)  | 5520(4)  | 62(2)    | 33(1) |
| O(6)  | 5443(3)  | 3317(3)  | -1490(1) | 44(1) |
| C(10) | 4186(6)  | 6139(4)  | 846(2)   | 53(2) |
| C(13) | 4979(5)  | 5285(4)  | 585(2)   | 37(1) |
| C(14) | 4118(6)  | 6518(4)  | -3(2)    | 50(1) |
| C(15) | 5932(5)  | 4700(4)  | -238(2)  | 34(1) |
| C(16) | 985(5)   | 4474(4)  | -70(2)   | 42(1) |

|       |         |         |          |       |
|-------|---------|---------|----------|-------|
| C(17) | 624(5)  | 4779(4) | 770(2)   | 44(1) |
| O(20) | 5031(3) | 3563(3) | 1016(1)  | 55(1) |
| C(23) | -10(5)  | 5676(4) | 512(2)   | 48(2) |
| C(24) | 3622(6) | 6899(4) | 484(2)   | 64(2) |
| C(26) | 6344(5) | 3787(4) | -1074(2) | 41(1) |
| C(29) | 5107(5) | 4351(4) | -728(2)  | 39(1) |
| C(35) | 1228(5) | 4037(3) | 417(2)   | 41(1) |
| C(36) | 5904(6) | 4264(4) | 681(2)   | 42(1) |
| C(1A) | 6126(6) | 3774(4) | 152(2)   | 38(1) |

Table 7. Anisotropic displacement parameters ( $\text{\AA}^2 \times 10^3$ ) for **15**.

The anisotropic displacement factor exponent takes the form:

$$-2\pi^2 [h^2 a^{*2} U_{11} + \dots + 2hka^*b^* U_{12}]$$

|       | U11   | U22   | U33   | U23    | U13   | U12    |
|-------|-------|-------|-------|--------|-------|--------|
| Fe(2) | 39(1) | 48(1) | 25(1) | -3(1)  | 2(1)  | 2(1)   |
| O(1)  | 39(2) | 56(2) | 19(2) | -2(2)  | 0(2)  | 8(2)   |
| C(2)  | 41(3) | 34(3) | 25(3) | -1(3)  | 2(2)  | -5(2)  |
| C(4)  | 50(3) | 40(3) | 31(3) | 3(3)   | 3(3)  | -10(3) |
| C(9)  | 36(2) | 43(3) | 27(3) | 4(3)   | 2(2)  | 1(2)   |
| C(11) | 40(3) | 63(4) | 49(4) | 4(3)   | -9(2) | 11(3)  |
| C(12) | 37(3) | 58(4) | 34(3) | -6(3)  | 6(2)  | -3(3)  |
| C(18) | 35(3) | 50(3) | 25(3) | -3(3)  | -1(2) | -7(2)  |
| C(19) | 38(3) | 42(3) | 25(3) | 0(2)   | 5(2)  | 2(2)   |
| C(21) | 37(3) | 53(3) | 38(3) | 8(3)   | -2(2) | -8(3)  |
| C(22) | 32(3) | 56(3) | 50(3) | 3(4)   | -1(3) | -11(2) |
| O(25) | 43(2) | 53(2) | 42(2) | 12(2)  | 2(2)  | 6(2)   |
| C(30) | 43(3) | 53(3) | 26(3) | -8(3)  | -2(2) | -4(3)  |
| C(31) | 56(3) | 41(3) | 35(3) | -11(3) | 7(3)  | 1(3)   |
| C(32) | 41(3) | 39(3) | 31(3) | -2(3)  | -4(2) | 6(2)   |
| C(34) | 42(3) | 73(5) | 53(4) | -9(3)  | 10(3) | 7(3)   |
| C(38) | 42(3) | 89(5) | 29(3) | -1(3)  | 4(3)  | -9(3)  |

|       |       |       |        |        |       |        |
|-------|-------|-------|--------|--------|-------|--------|
| C(42) | 42(3) | 52(3) | 31(3)  | -2(3)  | -4(2) | 0(2)   |
| Fe(1) | 37(1) | 33(1) | 39(1)  | 0(1)   | 5(1)  | -2(1)  |
| C(3)  | 47(3) | 49(4) | 55(4)  | 11(4)  | -7(3) | -3(3)  |
| C(5)  | 37(3) | 30(3) | 33(3)  | -2(3)  | 4(2)  | -9(3)  |
| O(6)  | 48(2) | 60(3) | 25(2)  | -9(2)  | 0(2)  | 14(2)  |
| C(10) | 41(3) | 61(4) | 55(4)  | -21(3) | 13(3) | -10(3) |
| C(13) | 33(3) | 45(4) | 33(3)  | -12(3) | 4(2)  | -4(2)  |
| C(14) | 53(3) | 39(3) | 60(4)  | 11(3)  | 23(3) | -1(3)  |
| C(15) | 34(3) | 38(3) | 31(3)  | 2(2)   | 2(2)  | 6(2)   |
| C(16) | 37(3) | 50(3) | 39(3)  | 4(3)   | -4(2) | -14(3) |
| C(17) | 36(3) | 47(4) | 47(3)  | 5(3)   | 1(2)  | -4(2)  |
| O(20) | 42(2) | 85(3) | 37(2)  | 28(2)  | 11(2) | 8(2)   |
| C(23) | 38(3) | 37(3) | 69(4)  | 6(3)   | 10(3) | 9(2)   |
| C(24) | 60(4) | 29(3) | 102(5) | -13(4) | 28(3) | -9(3)  |
| C(26) | 45(3) | 54(3) | 24(3)  | 4(3)   | 2(2)  | 3(3)   |
| C(29) | 36(3) | 61(4) | 20(3)  | -5(3)  | 1(2)  | 8(2)   |
| C(35) | 42(3) | 26(3) | 56(4)  | 6(3)   | 5(3)  | 3(2)   |
| C(36) | 34(3) | 70(4) | 22(3)  | 7(3)   | 4(2)  | -6(3)  |
| C(1A) | 41(3) | 35(3) | 37(3)  | 3(2)   | 1(2)  | 7(2)   |

Table 8. Hydrogen coordinates ( $\times 10^4$ ) and isotropic displacement parameters ( $\text{\AA}^2 \times 10^3$ ) for **15**.

|        | x     | y     | z    | U(eq) |
|--------|-------|-------|------|-------|
| H(1)   | 6765  | 8461  | 3514 | 57    |
| H(4)   | 7551  | 6043  | 2590 | 48    |
| H(9)   | 4612  | 9236  | 1947 | 42    |
| H(11)  | 11393 | 6714  | 2634 | 61    |
| H(12)  | 10679 | 8653  | 2775 | 51    |
| H(19)  | 5052  | 8223  | 2922 | 42    |
| H(21A) | 4742  | 11218 | 1580 | 51    |
| H(21B) | 6082  | 11420 | 2025 | 51    |

|        |       |       |       |    |
|--------|-------|-------|-------|----|
| H(22)  | 10483 | 9590  | 1931  | 55 |
| H(25)  | 7932  | 11918 | 1439  | 69 |
| H(30)  | 6964  | 7494  | 1206  | 49 |
| H(31)  | 7807  | 5758  | 1638  | 53 |
| H(32A) | 7437  | 9827  | 2586  | 45 |
| H(32B) | 5431  | 9982  | 2699  | 45 |
| H(34)  | 11736 | 6427  | 1687  | 68 |
| H(38)  | 11143 | 8187  | 1269  | 64 |
| H(42A) | 7881  | 10053 | 1650  | 50 |
| H(42B) | 6357  | 9796  | 1269  | 50 |
| H(3)   | -80   | 5973  | -276  | 60 |
| H(6)   | 6040  | 2828  | -1617 | 66 |
| H(10)  | 4053  | 6194  | 1200  | 63 |
| H(14)  | 3925  | 6873  | -314  | 61 |
| H(15)  | 7091  | 4997  | -313  | 41 |
| H(16)  | 1282  | 4140  | -379  | 51 |
| H(17)  | 641   | 4690  | 1125  | 52 |
| H(20)  | 5696  | 3072  | 1109  | 82 |
| H(23)  | -506  | 6296  | 661   | 58 |
| H(24)  | 3022  | 7545  | 553   | 76 |
| H(26A) | 7198  | 4307  | -1201 | 49 |
| H(26B) | 6958  | 3219  | -887  | 49 |
| H(29A) | 4142  | 3863  | -653  | 47 |
| H(29B) | 4640  | 4990  | -901  | 47 |
| H(35)  | 1716  | 3357  | 491   | 49 |
| H(36)  | 7056  | 4432  | 823   | 50 |
| H(1A1) | 5247  | 3216  | 92    | 45 |
| H(1A2) | 7268  | 3438  | 121   | 45 |

---
